# Supplementary material for: Designing in situ simulation in the emergency department: evaluating safety attitudes amongst physicians and nurses
Source: PubMed Central journal article supplement (PMC5806390; doi:10.1186/s41077-017-0037-2), 2017-02-08
Supplement: 41077_2017_37_MOESM1_ESM.pdf [file 41077_2017_37_MOESM1_ESM.pdf]

27/10

Teammedlemmer (Sæt kryds hver gang en ny person er til stede. Skriv gerne navn.)

|                            |                   |                   |                   |                    |                    |                   |                        |
|----------------------------|-------------------|-------------------|-------------------|--------------------|--------------------|-------------------|------------------------|
| Sygeplejerske 1<br>x Maria | Sygeplejerske 2   | Sygeplejerske 3   | Bioanalytiker     | Serviceassistent 1 | Serviceassistent 2 | Lægesekretær      | Ambulanceredder 1<br>J |
| Medicinsk forvagt          | Medicinsk bagvagt | Kirurgisk forvagt | Kirurgisk bagvagt | Akuttæge<br>x Lars | Anæstesiolog       | Anæ.sygeplejerske | Ambulanceredder 2<br>J |

Triagering (Sæt kryds ved triagefarve. Ved ændring, da en pil over til den nye farve)

|               |             |     |        |
|---------------|-------------|-----|--------|
| Gul<br>1800 ← | Orange<br>X | Rød | Traume |
|---------------|-------------|-----|--------|

"Scannet" for et år siden  
 lille forsmækkelse  
 lungeproblemer  
 men ej lungekræft

|     |                                                                                                                                                                                                                                                                                                                                                                                                                                         |                   |            |
|-----|-----------------------------------------------------------------------------------------------------------------------------------------------------------------------------------------------------------------------------------------------------------------------------------------------------------------------------------------------------------------------------------------------------------------------------------------|-------------------|------------|
| Tid | Sted: Sk.st. ned, var 4-5                                                                                                                                                                                                                                                                                                                                                                                                               | Obs. start: 17:28 | Obs. slut: |
|     | Overordnet patientproblematik: 43 år, brystom. blevet noget bedre siden debut omkring kl. 12:00. strål → hals/hænder, + u. arm. Hænder ligger i ryggen.<br>Hvorfra kommer sygehistorie (journal, patient, Falck etc.): Tidl. kendt med samme. Forsøgt ATG uden succes.<br>Patientens vitale parametre: A: FRI B: FRI, nat hypervent. C: 120/90 P 78 SaO2 98<br>D: Vægen relevant. E: SK, EKG ia.<br>pt. "bauge"! "opistotomus" svulende |                   |            |

Overskrift og oversigt, højdepunkter, begivenheder som er særligt vigtige. Skriv gerne et tema.

Handelsbauge 77-år, 43 år, tidl. verificeret corona forsmækkelse. Nu angina, men alle tests incl. ECG = ia. mangelfuld kommunikation → ned. fr. eller i store træk i kommunikation.

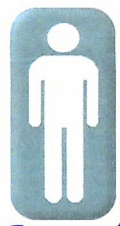

Kommunikeres præcist, relevant og kortfattet? (closed loops, hand-off, call-outs). Italesættes "mavefornemmelse", tentativ diagnose og symptomatologi? Tager modtager medansvar for sikker kommunikation?

18:37 Sgpt. kontakt til ned. fr. = noget "rodet" overlevering. (Sgpt. er uet ud)  
 18:42 Sgpt. kontakt → akutlæge. En kort leetud Blev ISBAR brugt? Faldt SGPL  
 efter ISBAR princippet. dog ej italesættelse af de to sider = A og R  
 18:44 Sgpt → NEG spray = m. nogen effekt.  
 18:47 Sgpt lavt "Mafin-cloka-coupe med akutlæge" Blev ABCDE brugt? ikke af Falck  
 18:48 Akutlæge: Skal vi tage den der "Wärthstest" Sgpt. nej den er taget, og var negativ.  
 Hurtigt test = Colortest / INT prøvet.

|             |                          |
|-------------|--------------------------|
| Airway      | <input type="checkbox"/> |
| Breathing   | <input type="checkbox"/> |
| Circulation | <input type="checkbox"/> |
| Disability  | <input type="checkbox"/> |
| Exposure    | <input type="checkbox"/> |

|                                            |                                     |
|--------------------------------------------|-------------------------------------|
| <b>Identifikation</b>                      | <input type="checkbox"/>            |
| Meddelerens navn, funktion og afdeling     | <input type="checkbox"/>            |
| Patientens navn, CPR                       | <input checked="" type="checkbox"/> |
| <b>Situation</b>                           | <input type="checkbox"/>            |
| Beskrivelse af situationen                 | <input checked="" type="checkbox"/> |
| Målte værdier                              | <input checked="" type="checkbox"/> |
| Observerede ændringer i værdier            | <input checked="" type="checkbox"/> |
| <b>Baggrund</b>                            | <input type="checkbox"/>            |
| Indlæggelsesdiagnose og dato               | <input checked="" type="checkbox"/> |
| Kort sygehistorie                          | <input checked="" type="checkbox"/> |
| <b>Analyse</b>                             | <input type="checkbox"/>            |
| Vurdering af problemet                     | <input type="checkbox"/>            |
| <b>Råd</b>                                 | <input type="checkbox"/>            |
| Giv eller bed om råd til videre behandling | <input type="checkbox"/>            |

Nej. Italesætter ej sym. p. tone.

Fortolkning: Udfyld næste side, hvis der er tid efter beskrivelser ovenfor!

18:55 Intet fyldt på Corona problemet → Sgpt g læge lave plan for obs  
 - kalkuleret 5 min. tid.
